# Supplementary material for: Genetic Aspects of Problematic and Risky Internet Use in Young Men—Analysis of ANKK1, DRD2 and NTRK3 Gene Polymorphism
Source: MDPI journal article supplement (doi:10.3390/genes15020169), 2024-01-27
Supplement: s1 [file s1]

### Test Problematycznego Używania Internetu

Przeczytaj uważnie każde stwierdzenie dotyczące Twojego korzystania z Internetu. Zaznacz tylko **jedną odpowiedź**, która **najlepiej** oddaje prawdę na temat tego, jak często zachowujesz się, myślisz lub czujesz w opisany sposób, w związku z Twoim używaniem Internetu. Wykorzystuj cały zakres możliwych odpowiedzi, od „nigdy” do „zawsze”. Kiedy mowa jest o „przebywaniu online” lub w „sieci”, mamy na myśli Twoje korzystanie z Internetu.

Proszę wskazać znakiem „X” jedną odpowiedź.

|     |                                                                                                                            | nigdy | sporady-<br>cznie | rzadko | czasami | często | zawsze |
|-----|----------------------------------------------------------------------------------------------------------------------------|-------|-------------------|--------|---------|--------|--------|
| 1.  | Uświadamiam sobie, że przebywam w sieci dłużej, niż pierwotnie zamierzałam/em                                              |       |                   |        |         |        |        |
| 2.  | Zaniedbuję obowiązki domowe na rzecz dłuższego przebywania online.                                                         |       |                   |        |         |        |        |
| 3.  | Wybieram podekscytowanie związane z Internetem, zamiast bliskości mojego/mojej partnera/partnerki, przyjaciół lub rodziny. |       |                   |        |         |        |        |
| 4.  | Tworzę nowe związki z współużytkownikami sieci kosztem związków z osobami z poza sieci.                                    |       |                   |        |         |        |        |
| 5.  | Osoby z mojego otoczenia skarżą się na ilość czasu, który spędzam online.                                                  |       |                   |        |         |        |        |
| 6.  | Zdarza mi się mówić: „jeszcze tylko kilka minut”, gdy jestem w sieci.                                                      |       |                   |        |         |        |        |
| 7.  | Z powodu zbyt długiego czasu spędzanego w sieci, narażam na szwank swoje wyniki w pracy/szkole.                            |       |                   |        |         |        |        |
| 8.  | Zdarza mi się ukrywać co naprawdę robię w sieci, gdy jestem o to pytana/y.                                                 |       |                   |        |         |        |        |
| 9.  | Wchodząc do Internetu uspokajam niepokojące myśli dotyczące mojego życia.                                                  |       |                   |        |         |        |        |
| 10. | Uświadamiam sobie, że myślę o tym, kiedy znów będę w sieci.                                                                |       |                   |        |         |        |        |
| 11. | Obawiam się, że moje życie bez Internetu byłoby nudne, puste i pozbawione radości.                                         |       |                   |        |         |        |        |
| 12. | Tracę panowanie nad sobą lub krzyczę, gdy ktoś przeszkadza mi gdy jestem online.                                           |       |                   |        |         |        |        |
| 13. | Zdarza mi się zaniedbywać sen z powodu długiego przebywania w sieci.                                                       |       |                   |        |         |        |        |
| 14. | Czuje się zaabsorbowana/y Internetem gdy jestem offline i fantazjuję na temat bycia online.                                |       |                   |        |         |        |        |
| 15. | Moje osiągnięcia w pracy/szkole cierpią z powodu zbyt długiego czasu spędzanego przeze mnie w sieci.                       |       |                   |        |         |        |        |
| 16. | Próbowałam/em bez powodzenia zredukować długość trwania moich sesji w Internecie.                                          |       |                   |        |         |        |        |
| 17. | Próbuję ukrywać przed innymi to, jak długo przebywam w sieci.                                                              |       |                   |        |         |        |        |
| 18. | Wybieram spędzanie czasu w sieci zamiast spotkania się z przyjaciółmi lub rodziną.                                         |       |                   |        |         |        |        |
| 19. | Czuję się poirytowana/y, nerwowa/y lub przygnębiona/y gdy jestem offline, ale uczucia te znikają gdy wracam do sieci.      |       |                   |        |         |        |        |
| 20. | Bycie online pozwala mi uśmierzyć moje negatywne uczucia (np. beznadziejności, smutku, przygnębienia, lęku czy winy).      |       |                   |        |         |        |        |
| 21. | Czuję się niespokojna/y, poirytowana/y czy przygnębiona/y myślą o konieczności ograniczenia korzystania z Internetu.       |       |                   |        |         |        |        |
| 22. | Zauważam, że muszę wydłużać czas spędzany w Internecie aby osiągnąć satysfakcję z korzystania z sieci.                     |       |                   |        |         |        |        |

zmodyfikowana adaptacja Internet Addiction Test K.Young w opracowaniu R.Poprawy z 2011, Instytut Psychologii Uniwersytetu Wrocławskiego
